# Supplementary material
Source: MDPI journal article supplement (https://www.mdpi.com/2673-4540/4/4/52)
Supplement: s1 [file s1 › diabetology-2685581-supplementary.pdf]

**Supplementary Table S1. ICD-10-CM and ICD-10-PCS Codes Used**

|                                                                                                                                                                          |
|--------------------------------------------------------------------------------------------------------------------------------------------------------------------------|
| <b>Diabetes</b>                                                                                                                                                          |
| <i>Type 2 diabetes mellitus with hyperosmolarity (E11.X)</i>                                                                                                             |
| <b>Dementia</b>                                                                                                                                                          |
| <i>Vascular dementia</i>                                                                                                                                                 |
| <i>Alzheimer's Disease (G30.X)</i>                                                                                                                                       |
| Vascular dementia, unspecified severity (F01.5X)                                                                                                                         |
| Vascular dementia, mild (F01.AX)                                                                                                                                         |
| Vascular dementia, moderate (F01.BX)                                                                                                                                     |
| Vascular dementia, severe (F01.CX)                                                                                                                                       |
| <i>Dementia in other diseases classified elsewhere</i>                                                                                                                   |
| Dementia in other diseases classified elsewhere, unspecified severity (F02.8X)                                                                                           |
| Dementia in other diseases classified elsewhere, mild (F02.AX)                                                                                                           |
| Dementia in other diseases classified elsewhere, moderate (F02.BX)                                                                                                       |
| Dementia in other diseases classified elsewhere, severe (F02.CX)                                                                                                         |
| <i>Unspecified dementia</i>                                                                                                                                              |
| Unspecified dementia, unspecified severity (F03.9X)                                                                                                                      |
| Unspecified dementia, mild (F03.AX)                                                                                                                                      |
| Unspecified dementia, moderate (F03.BX)                                                                                                                                  |
| Unspecified dementia, severe (F03.CX)                                                                                                                                    |
| <i>Huntington's Disease (G10)</i>                                                                                                                                        |
| <i>Parkinson's Disease (G20)</i>                                                                                                                                         |
| <i>Other secondary parkinsonism (G21.8)</i>                                                                                                                              |
| <i>Frontotemporal dementia (G31.0)</i>                                                                                                                                   |
| <i>Pick's Disease (G31.01)</i>                                                                                                                                           |
| <i>Other frontotemporal neurocognitive disorder (G31.09)</i>                                                                                                             |
| <i>Senile degeneration of the brain not elsewhere classified (G31.1)</i>                                                                                                 |
| <i>Neurocognitive disorder with Lewy bodies (G31.83)</i>                                                                                                                 |
| <b>Diabetic Complications</b>                                                                                                                                            |
| <i>Type 2 diabetes mellitus with ophthalmic complications (E11.3X)</i>                                                                                                   |
| <i>Type 2 diabetes mellitus with kidney complications (E11.2X)</i>                                                                                                       |
| <i>Type 2 diabetes mellitus with neurological complications (E11.4X)</i>                                                                                                 |
| <i>Hypertensive diseases</i>                                                                                                                                             |
| Essential (primary) hypertension (I10)                                                                                                                                   |
| Hypertensive heart disease without heart failure (I11.9)                                                                                                                 |
| Hypertensive heart disease with heart failure (I11.0)                                                                                                                    |
| Hypertensive chronic kidney disease with stage 1 through stage 4 chronic kidney disease, or unspecified chronic kidney disease (I12.9)                                   |
| Hypertensive chronic kidney disease with stage 5 chronic kidney disease or end stage renal disease (I12.0)                                                               |
| Hypertensive heart and chronic kidney disease with heart failure and stage 1 through stage 4 chronic kidney disease, or unspecified chronic kidney disease (I13.0)       |
| Hypertensive heart and chronic kidney disease with heart failure and with stage 5 chronic kidney disease, or end stage renal disease (I13.2)                             |
| Hypertensive heart and chronic kidney disease without heart failure, with stage 1 through stage 4 chronic kidney disease, or unspecified chronic kidney disease (I13.10) |
| Hypertensive heart and chronic kidney disease without heart failure, with stage 5 chronic kidney disease, or end stage                                                   |

|                                                                             |
|-----------------------------------------------------------------------------|
| renal disease (I13.11)                                                      |
| <i>Low-extremity amputations among people with Type 2 diabetes mellitus</i> |
| Detachment at right hindquarter, open approach (0Y620ZZ)                    |
| Detachment at left hindquarter, open approach (0Y630ZZ)                     |
| Detachment at bilateral hindquarter, open approach (0Y640ZZ)                |
| Detachment at right femoral region, open approach (0Y670ZZ)                 |
| Detachment at left femoral region, open approach (0Y680ZZ)                  |
| Detachment at right upper leg, high, open approach (0Y6C0Z1)                |
| Detachment at right upper leg, mid, open approach (0Y6C0Z2)                 |
| Detachment at right upper leg, low, open approach (0Y6C0Z3)                 |
| Detachment at left upper leg, high, open approach (0Y6D0Z1)                 |
| Detachment at left upper leg, mid, open approach (0Y6D0Z2)                  |
| Detachment at left upper leg, low, open approach (0Y6D0Z3)                  |
| Detachment at right knee region, open approach (0Y6F0ZZ)                    |
| Detachment at left knee region, open approach (0Y6G0ZZ)                     |
| Detachment at right lower leg, high, open approach (0Y6H0Z1)                |
| Detachment at right lower leg, mid, open approach (0Y6H0Z2)                 |
| Detachment at right lower leg, low, open approach (0Y6H0Z3)                 |
| Detachment at left lower leg, high, open approach (0Y6J0Z1)                 |
| Detachment at left lower leg, mid, open approach (0Y6J0Z2)                  |
| Detachment at left lower leg, low, open approach (0Y6J0Z3)                  |
| Detachment at right foot, complete, open approach (0Y6M0Z0)                 |
| Detachment at right foot, complete 1st ray, open approach (0Y6M0Z4)         |
| Detachment at right foot, complete 2nd ray, open approach (0Y6M0Z5)         |
| Detachment at right foot, complete 3rd ray, open approach (0Y6M0Z6)         |
| Detachment at right foot, complete 4th ray, open approach (0Y6M0Z7)         |
| Detachment at right foot, complete 5th ray, open approach (0Y6M0Z8)         |
| Detachment at right foot, partial 1st ray, open approach (0Y6M0Z9)          |
| Detachment at right foot, partial 2nd ray, open approach (0Y6M0ZB)          |
| Detachment at right foot, partial 3rd ray, open approach (0Y6M0ZC)          |
| Detachment at right foot, partial 4th ray, open approach (0Y6M0ZD)          |
| Detachment at right foot, partial 5th ray, open approach (0Y6M0ZF)          |
| Detachment at right foot, complete, open approach (0Y6M0Z0)                 |
| Detachment at right foot, complete 1st ray, open approach (0Y6M0Z4)         |
| Detachment at right foot, complete 2nd ray, open approach (0Y6M0Z5)         |
| Detachment at right foot, complete 3rd ray, open approach (0Y6M0Z6)         |
| Detachment at right foot, complete 4th ray, open approach (0Y6M0Z7)         |
| Detachment at right foot, complete 5th ray, open approach (0Y6M0Z8)         |
| Detachment at left foot, complete, open approach (0Y6N0Z0)                  |
| Detachment at left foot, complete 1st ray, open approach (0Y6N0Z4)          |
| Detachment at left foot, complete 2nd ray, open approach (0Y6N0Z5)          |
| Detachment at left foot, complete 3rd ray, open approach (0Y6N0Z6)          |
| Detachment at left foot, complete 4th ray, open approach (0Y6N0Z7)          |
| Detachment at left foot, complete 5th ray, open approach (0Y6N0Z8)          |
| Detachment at left foot, partial 1st ray, open approach (0Y6N0Z9)           |
| Detachment at left foot, partial 2nd ray, open approach (0Y6N0ZB)           |

|                                                                   |
|-------------------------------------------------------------------|
| Detachment at left foot, partial 3rd ray, open approach (0Y6N0ZC) |
| Detachment at left foot, partial 4th ray, open approach (0Y6N0ZD) |
| Detachment at left foot, partial 5th ray, open approach (0Y6N0ZF) |
| Detachment at left foot, complete, open approach (0Y6N0Z0)        |

**Coronavirus Disease 2019 (U07.1)**

Key: ICD-10-CM = International Classification of Disease, Tenth Revision, Clinical Modification; ICD-10-PCS = International Classification of Disease, Tenth Revision, Procedure Coding System
